# Supplementary figures and images for: Genetic and functional properties of uncultivated MCG archaea assessed by metagenome and gene expression analyses
Source: PubMed Central journal article supplement — ISME J. 2013 Oct 10;8(3):650–9. doi: 10.1038/ismej.2013.174 (PMC3930316; doi:10.1038/ismej.2013.174), 2013-10-10

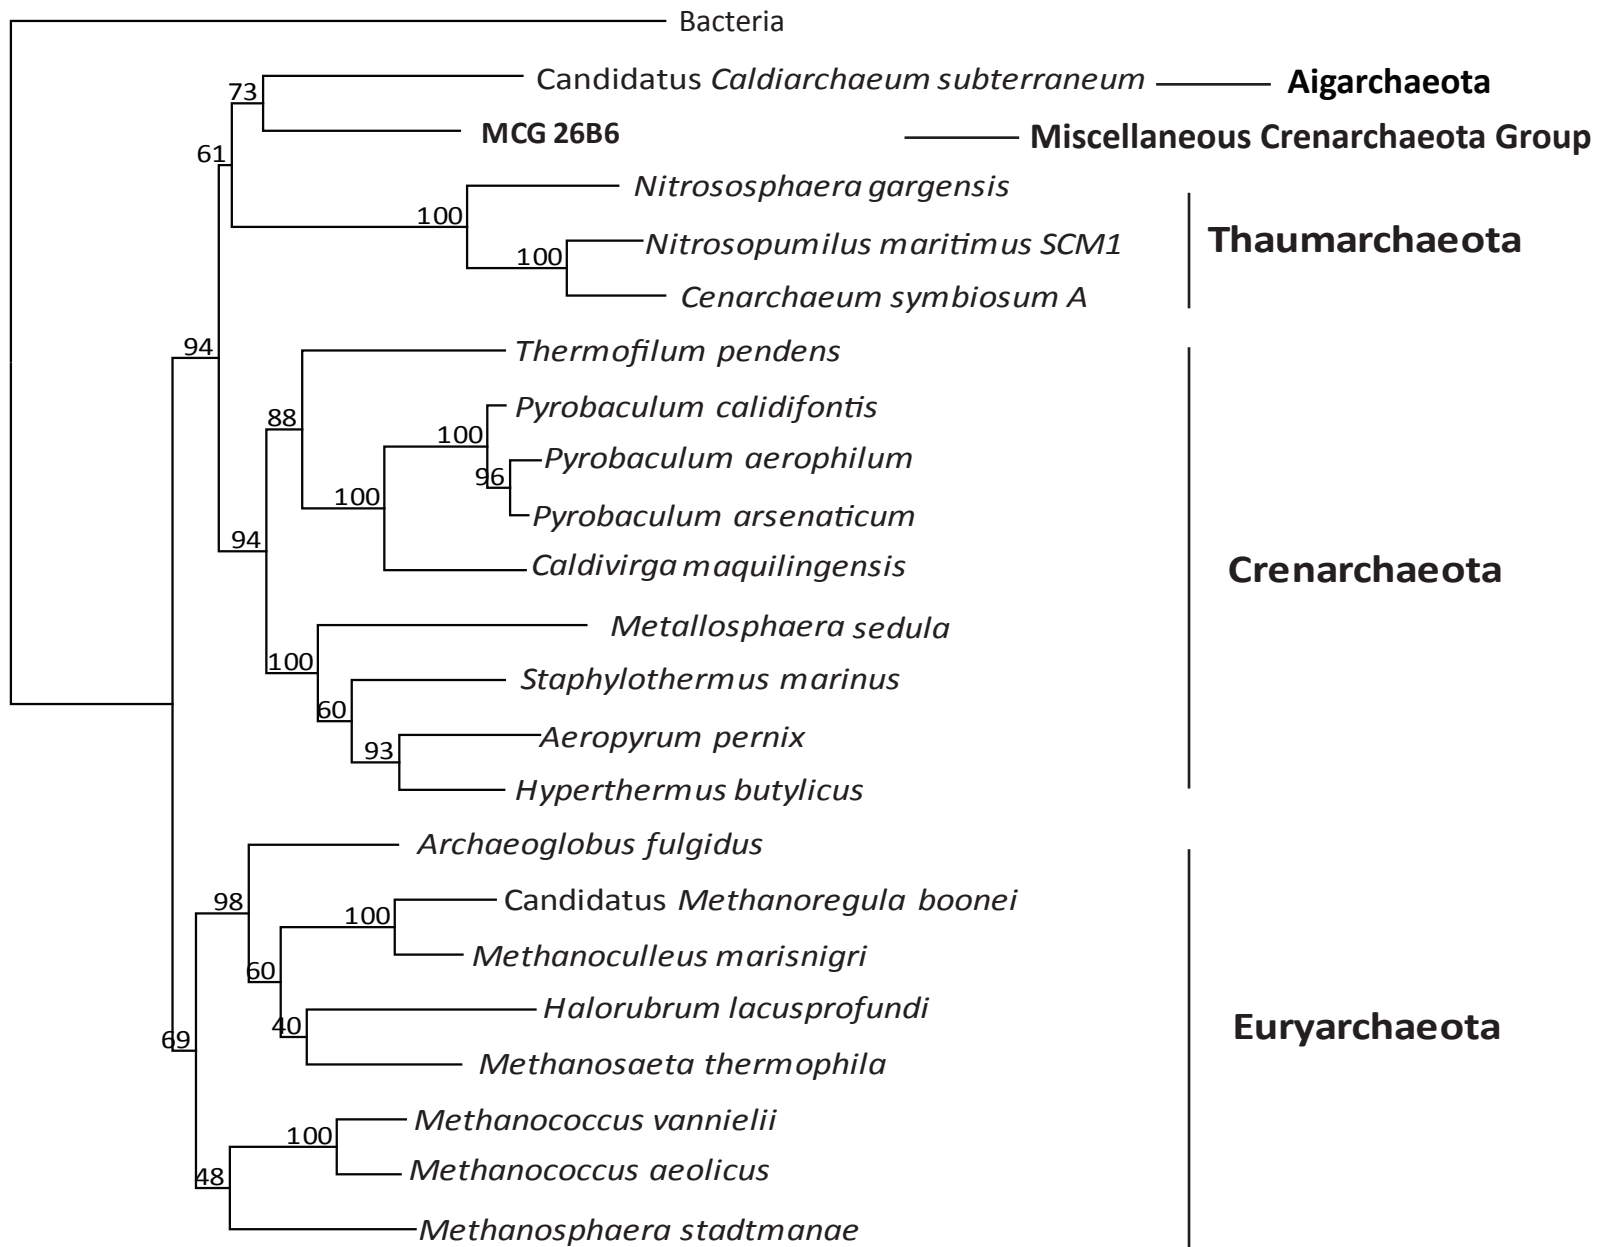

Supplement: ismej2013174x1.pdf [file ismej2013174x1.pdf]

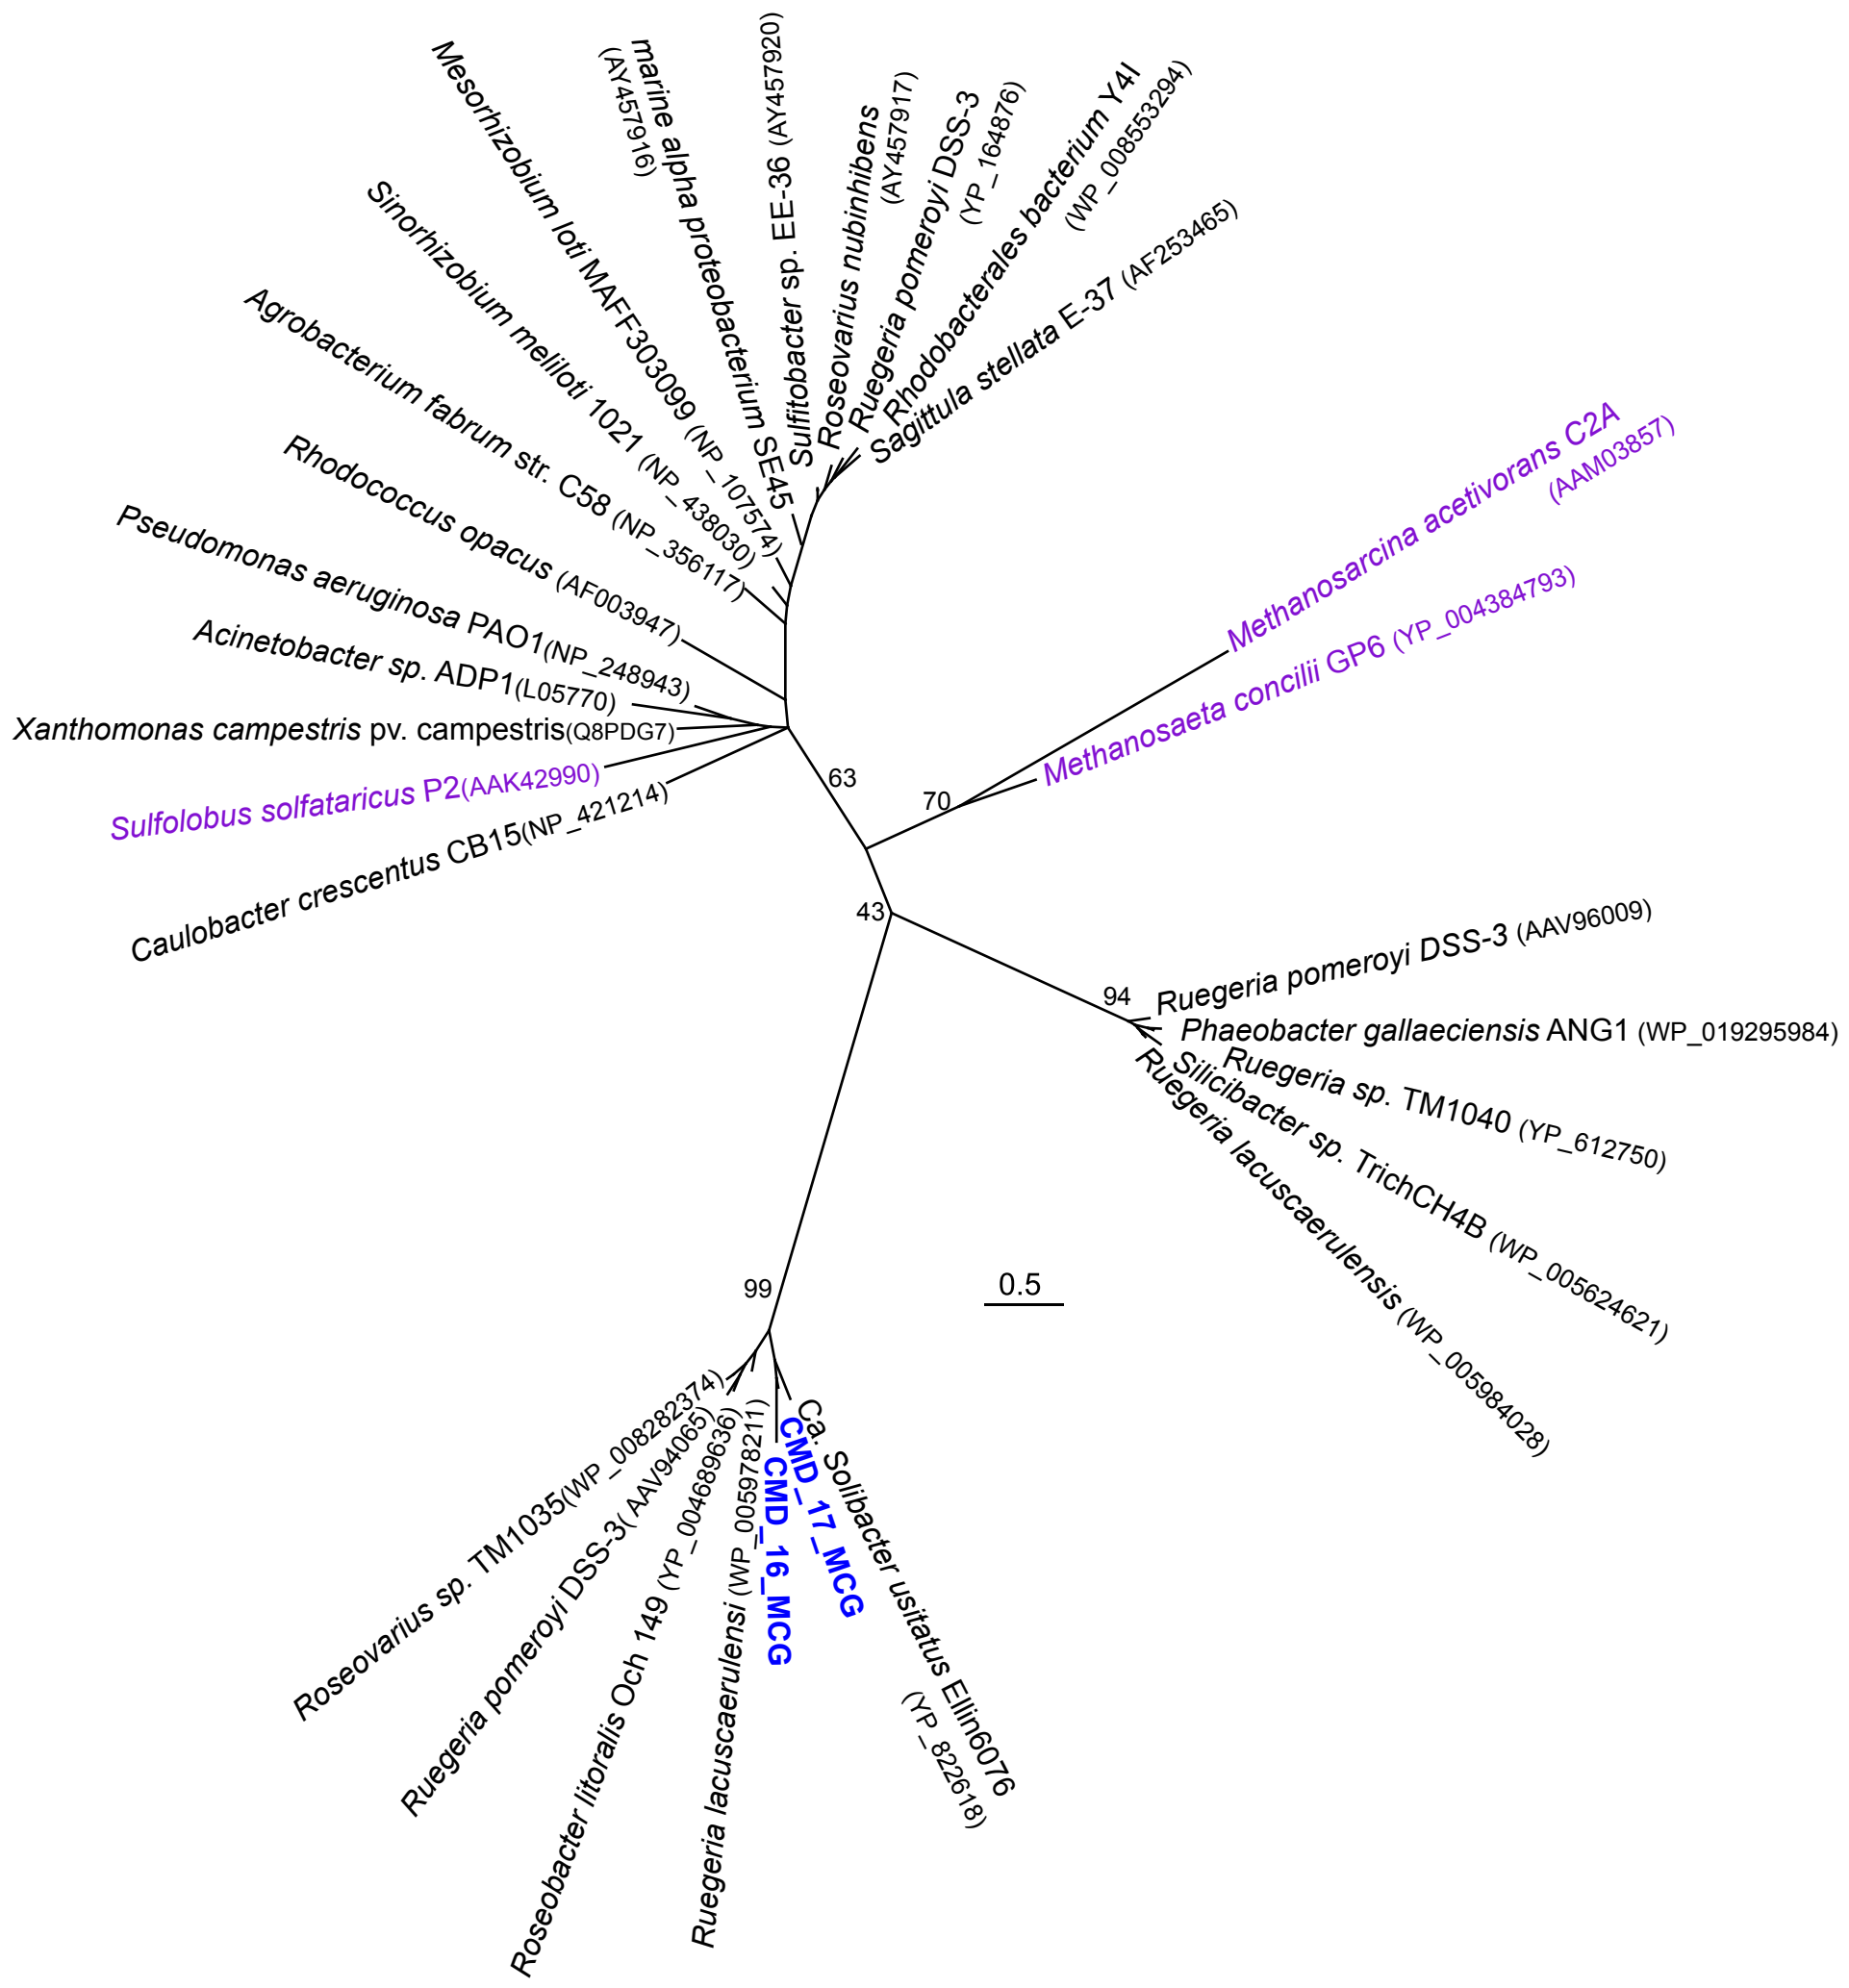

Supplement: ismej2013174x2.pdf [file ismej2013174x2.pdf]
